# Supplementary material for: Detection of pathogenic bacteria in milk and whey samples using a fluorescence resonance energy transfer aptasensor based on cerium oxide nanoparticles
Source: Royal Society of Chemistry journal article supplement (doi:10.1039/d1ay02023d), 2021-12-22
Supplement: d1ay02023d1.pdf [file d1ay02023d1.pdf]

**Detection of Pathogenic Bacteria in Milk and Whey Samples using A  
Fluorescence Resonance Energy Transfer Aptasensor based on Cerium Oxide  
Nanoparticles**

**Sena Ghayyem<sup>1</sup>, Farnoush Faridbod<sup>1\*</sup>**

*<sup>1</sup>Analytical Chemistry Department, School of Chemistry, College of Science, University of Tehran,  
Tehran, Iran*

**Table S1.** Factors and levels of the orthogonal test

| Level | Factors    |                                    |                      |
|-------|------------|------------------------------------|----------------------|
|       | A(time(h)) | B(Azm-CeO <sub>2</sub> NPs(mg/mL)) | C(Aptamer-AuNPs(nM)) |
| 1     | 0.25       | 0.05                               | 3                    |
| 2     | 0.5        | 0.1                                | 6                    |
| 3     | 1          | 0.15                               | 9                    |

**Table S2.** Results of the orthogonal test ( $F_0$  is the initial fluorescence intensity of CeO<sub>2</sub> nanoparticles and F is the fluorescence intensity in different situations)

| No. | Level of A | Level of B | Level of C | F   | $F_0$ | $\Delta F$ |
|-----|------------|------------|------------|-----|-------|------------|
| 1   | 1          | 1          | 1          | 310 | 430   | 120        |
| 2   | 1          | 2          | 2          | 270 | 430   | 160        |
| 3   | 1          | 3          | 3          | 350 | 430   | 80         |
| 4   | 2          | 1          | 2          | 480 | 760   | 280        |
| 5   | 2          | 2          | 3          | 400 | 760   | 360        |
| 6   | 2          | 3          | 1          | 330 | 760   | 430        |
| 7   | 3          | 1          | 3          | 750 | 980   | 230        |
| 8   | 3          | 2          | 1          | 690 | 980   | 290        |
| 9   | 3          | 3          | 2          | 720 | 980   | 260        |

**Table S3.** Analysis of the results of the orthogonal test ( $k_i$  is the sum of level  $i$  ( $i= 1, 2, 3$ ) and  $K_i$  is the averages of level  $i$  ( $i= 1, 2, 3$ ))

| <b>No.</b>              | <b><math>\Delta F</math></b> |                    |                    |
|-------------------------|------------------------------|--------------------|--------------------|
|                         | <b>A</b>                     | <b>B</b>           | <b>C</b>           |
| <b><math>k_1</math></b> | 360                          | 630                | 840                |
| <b><math>k_2</math></b> | 1070                         | 810                | 700                |
| <b><math>k_3</math></b> | 780                          | 770                | 670                |
| <b><math>K_1</math></b> | 120                          | 210                | 280                |
| <b><math>K_2</math></b> | 356.67                       | 270                | 233.33             |
| <b><math>K_3</math></b> | 260                          | 256.67             | 223.33             |
| <b>R</b>                | 236.67                       | 60                 | 56.7               |
| <b>Trend</b>            | <b>2&gt;3&gt;1</b>           | <b>2&gt;3&gt;1</b> | <b>1&gt;2&gt;3</b> |
